# Supplementary material for: Abcg2 labels multiple cell types in skeletal muscle and participates in muscle regeneration
Source: PubMed Central journal article supplement — J Cell Biol. 2011 Oct 3;195(1):147–63. doi: 10.1083/jcb.201103159 (PMC3187700; doi:10.1083/jcb.201103159), 2011-10-03
Supplement: supp_jcb.201103159_JCB_201103159_sm.pdf [file supp_jcb.201103159_JCB_201103159_sm.pdf]

Doyle et al., <http://www.jcb.org/cgi/content/full/jcb.201103159/DC1>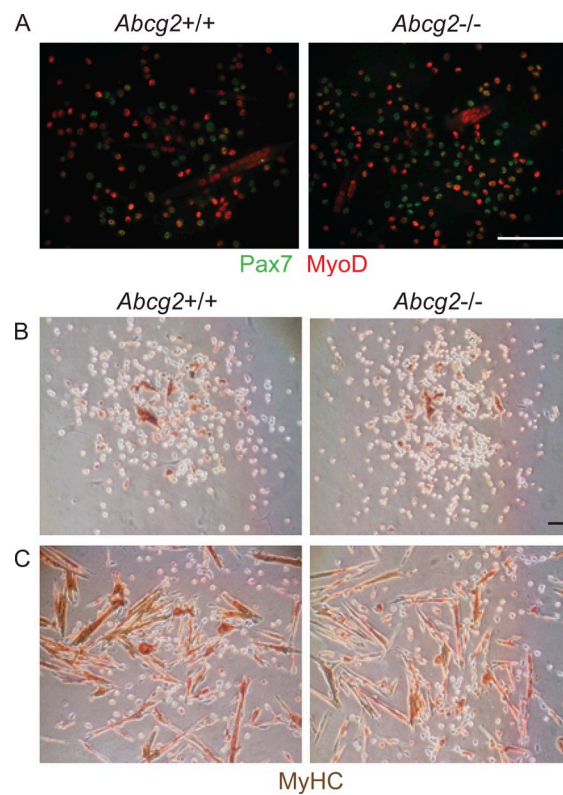

Figure S1. **Satellite cell cultures from *Abcg2*<sup>-/-</sup> mice show no defects.** Primary cells were isolated from hind-limb muscles of wild-type and *Abcg2*<sup>-/-</sup> cells, preplated overnight, and cultured for 3–5 d. (A) Primary cells harvested after 3 d in culture were stained with Pax7 and MyoD. Bar, 50  $\mu$ m. (B and C) Cells cultured for 3 d (B) or 5 d (C) were stained with myosin heavy chain (MyHC). Bar, 100  $\mu$ m.  $n = 3$  independent experiments.

A *Actin<sup>CreERT2</sup>;R26R*

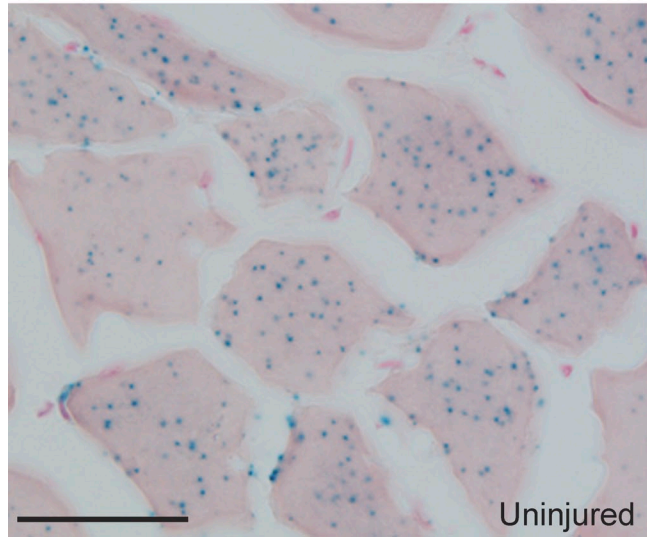

B *Abcg2<sup>CreERT2</sup>;R26R*

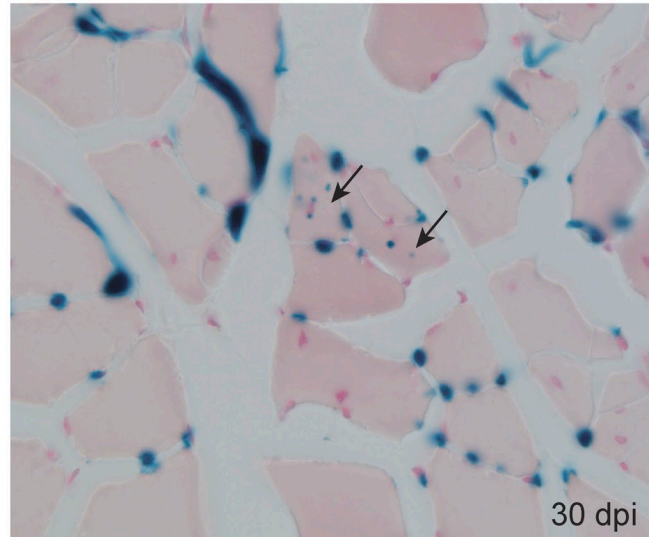

Figure S2. **Punctate X-gal staining is detected in myofibers of *Actin<sup>CreERT2</sup>;R26R* mice.** (A and B) X-gal staining of tissue sections from *Actin<sup>CreERT2</sup>;R26R* uninjured TA muscle 30 d after tamoxifen treatment (A) and from *Abcg2<sup>CreERT2</sup>;R26R* 30 d postinjury (dpi) TA muscle injured during tamoxifen treatment (B). Arrows indicate two fibers with punctate  $\beta$ -galactosidase staining. Bar, 50  $\mu$ m.
